# Supplementary material
Source: Springer Nature journal article supplement (https://www.springermedizin.de/resource/supplementary/12950_2009_128_MOESM6_ESM.pdf/9558140)

## A. Eosinophils

## B. Neutrophils

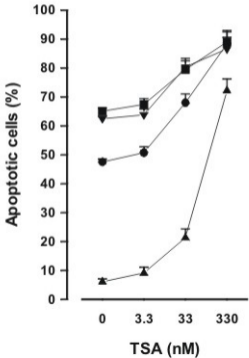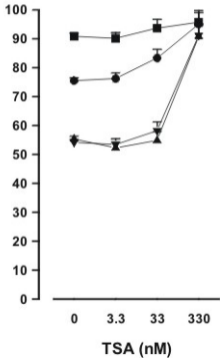

Supplement: MOESM6 [file 9558140]
